# Supplementary material for: Recurrence patterns and clinical outcomes in adult cerebellar glioblastoma
Source: Research Square preprint supplement (doi:10.21203/rs.3.rs-6650922/v1), 2025-06-03
Supplement: Supplementary file 1 [file e98d829cb8d4aa663c431d0d.xlsx]

## Sheet: Sheet1
Table 1 Patient characteristics and results of adult cerebellar glioblastoma
Case No.	Age/sex	Primary lesion	Surgical resection	Post-operative treatment	PFS (months)	Pattern of progression	Treatment at reccurence	OS (months)	OS after Bev (months)	Status	IDH mutation type	TERT promoter status	H3F3A status
1	60/F	tonsil	GTR	Radiation (60Gy/30Fr) TMZ	16.3	dissemination (supratentorial)	no	20.8	-	dead	wild	wild	wild
2	61/F	vermis	GTR	Radiation (60Gy/30Fr) TMZ	165.9	-	-	165.9	-	dead	wild	wild	wild
3	55/F	tonsil + hemisphere	subtotal	Radiation (60Gy/30Fr) TMZ	15.3	local	no	23.7	-	NA	wild	wild	wild
4	70/M	hemisphere	GTR	Radiation (60Gy/30Fr) TMZ	6	distant (thoracic vertebra)	Radiation	11	-	dead	wild	wild	wild
5	79/M	hemisphere	GTR	Radiation (44Gy/22Fr)* TMZ	14	dissemination (supra + infratentorial)	Bev	22.8	8.4	dead	wild	wild	wild
6	84/M	hemisphere	GTR	Radiation (40Gy/15Fr) TMZ	-	-	-	46.9	-	alive	wild	NA	NA
7	66/M	hemisphere	GTR	Radiation (60Gy/30Fr) TMZ	20.3	dissemination (supra + infratentorial)	TMZ rechallenge Radiation Bev	36.5	4.7	dead	wild	wild	wild
8	68/F	hemisphere	GTR	Radiation (60Gy/30Fr) TMZ	8.2	dissemination (supratentorial + spinal cord)	Bev	11.4	3.1	dead	wild	wild	wild
9	71/M	flocculus	GTR	Radiation (60Gy/30Fr) TMZ	-	-	-	6.8	-	alive	wild	wild	wild
10	70/F	hemisphere	GTR	Radiation (60Gy/30Fr) TMZ	2	dissemination (supratentorial + spinal cord)	Bev	16	13.7	dead	wild	wild	wild
11	51/M	cerebellar peduncle	partial	Radiation (60Gy/30Fr) TMZ	11.6	dissemination (spinal cord)	Bev	13	0.6	alive	wild	wild	wild
IDH: isocitrate dehydrogenase, CNS: central nervous system, WHO: world health organization, GTR: gross total removal, TMZ: temozolomide, Bev: Bevacizumab, Gy: gray, Fr: fractions, PFS: progression free survival, OS: overall survival, TERT: telomerase reverse transcriptase, NA: not appricable, *: interruption
